# Supplementary material for: Feedback regulation of BMP signaling by Caenorhabditis elegans cuticle collagens
Source: PubMed Central journal article supplement — Mol Biol Cell. 2020 Apr 1;31(8):825–32. doi: 10.1091/mbc.E19-07-0390 (PMC7185965; doi:10.1091/mbc.e19-07-0390), 2020-04-01
Supplement: mbc-31-825-s001.pdf [file mbc-31-825-s001.pdf]

# Supplemental Materials

*Molecular Biology of the Cell*

Madaan et al.

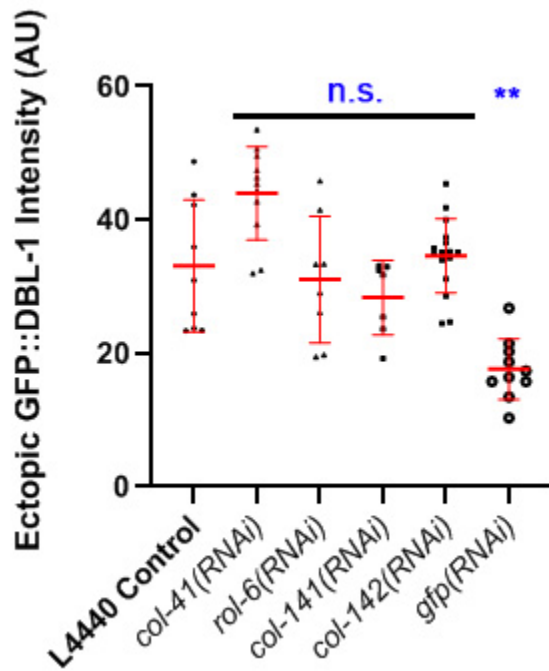

**Supplementary Figure 1. Loss of cuticle collagen gene function has no significant effect on expression of a hypodermal GFP::DBL-1 fusion protein.** A strain carrying *tex1s121*, a transgene expressing GFP::DBL-1 driven by a hypodermal-specific promoter, was treated with collagen RNAi as indicated. Fluorescence intensity was measured in one-day old adults. One representative trial is shown. AU: arbitrary units. Each data point depicts the intensity of equivalent regions of interest. Bars show mean and standard deviation of the data. Statistical significance compared with control was determined by Brown-Forsythe and Welch ANOVA tests. n.s. not significant; \*\*  $p < 0.01$ .
